# Supplementary material for: Distinct Bottom-Water Bacterial Communities at Methane Seeps With Various Seepage Intensities in Haima, South China Sea
Source: Frontiers journal article supplement (doi:10.3389/fmars.2021.753952), 2021-11-15
Supplement: Table_1.xlsx [file Table_1.xlsx]

## Sheet: Sheet1
	OTUID	Assigned_Genus	Genus_usearch	Genus_RDP	Conf_RDP	Genus_blastn	Adj_iden	Identity	Q.cov	S.id	S.desp	Additional information
1	OTU_2334	Anaerobutyricum	[Eubacterium]_hallii_group	Anaerobutyricum	0.99	[Eubacterium]_hallii_group	0.9951	0.99505	1	AF376231.1.1347	Bacteria;Firmicutes;Clostridia;Lachnospirales;Lachnospiraceae;[Eubacterium]halliigroup;unculturedbacterium	The species Eubacterium halii was reclassified as Anaerobutyricum hallii in 2018 Shetty SA, Zuffa S, Bui TPN, Aalvink S, Smidt H, De Vos WM. Reclassification of Eubacterium hallii as Anaerobutyricum hallii gen. nov., comb. nov., and description of Anaerobutyricum soehngenii sp. nov., a butyrate and propionate-producing bacterium from infant faeces. Int J Syst Evol Microbiol. 2018 Dec;68(12):3741-…
2	OTU_263	Anaerobutyricum	[Eubacterium]_hallii_group	Anaerobutyricum	1	[Eubacterium]_hallii_group	1	1	1	FN563387.1.1541	Bacteria;Firmicutes;Clostridia;Lachnospirales;Lachnospiraceae;[Eubacterium]halliigroup;unculturedbacterium
3	OTU_103	Polaribacter	[Polaribacter]_huanghezhanensis	Polaribacter	0.84	Polaribacter	1	1	1	HQ433366.1.1390	Bacteria;Bacteroidota;Bacteroidia;Flavobacteriales;Flavobacteriaceae;Polaribacter;unculturedFlavobacteriiabacterium
4	OTU_253	Mediterraneibacter	[Ruminococcus]_torques_group	Mediterraneibacter	0.44	[Ruminococcus]_torques_group	1	1	1	EF025229.1.1453	Bacteria;Firmicutes;Clostridia;Lachnospirales;Lachnospiraceae;[Ruminococcus]torquesgroup;unculturedbacterium	Ruminococcus torques was reclassified to a novel genus Mediterraneibacter in 2018 Togo AH, Diop A, Bittar F, Maraninchi M, Valero R, Armstrong N, Dubourg G, Labas N, Richez M, Delerce J, Levasseur A, Fournier PE, Raoult D, Million M. Description of Mediterraneibacter massiliensis, gen. nov., sp. nov., a new genus isolated from the gut microbiota of an obese patient and reclassification of Ruminoc…
5	OTU_165	Acinetobacter	Acinetobacter	Acinetobacter	1	Acinetobacter	1	1	1	JF344342.1.1496	Bacteria;Proteobacteria;Gammaproteobacteria;Pseudomonadales;Moraxellaceae;Acinetobacter;unculturedgammaproteobacterium
6	OTU_1656	Acinetobacter	Acinetobacter	Acinetobacter	1	Acinetobacter	1	1	1	CP029489.3459088.3460628	Bacteria;Proteobacteria;Gammaproteobacteria;Pseudomonadales;Moraxellaceae;Acinetobacter;Acinetobacterpittii
7	OTU_261	Acinetobacter	Acinetobacter	Acinetobacter	1	Acinetobacter	1	1	1	JN697570.1.1405	Bacteria;Proteobacteria;Gammaproteobacteria;Pseudomonadales;Moraxellaceae;Acinetobacter;unculturedAcinetobactersp.
8	OTU_2714	Acinetobacter	Acinetobacter	Acinetobacter	1	Acinetobacter	1	1	1	JX222876.1.1353	Bacteria;Proteobacteria;Gammaproteobacteria;Pseudomonadales;Moraxellaceae;Acinetobacter;unculturedbacterium
9	OTU_37	Acinetobacter	Acinetobacter	Acinetobacter	1	Acinetobacter	1	1	1	EU538359.1.1383	Bacteria;Proteobacteria;Gammaproteobacteria;Pseudomonadales;Moraxellaceae;Acinetobacter;unculturedbacterium
10	OTU_41	Marisediminitalea	Aestuariibacter	Marisediminitalea	0.97	Aestuariibacter	1	1	1	FJ847832.1.1232	Bacteria;Proteobacteria;Gammaproteobacteria;Enterobacterales;Alteromonadaceae;Aestuariibacter;Aestuariibacteraggregatus	The Aestuariibacter aggregatus has been reclassified as Marisediminitalea aggregata. Zhang, D., Gui, J., Zheng, S., Zhu, X., Wu, S., Tian, Y., Lai, Q., and Xu, H.nov. "Marisediminitalea mangrovi gen. nov., sp. nov., isolated from marine mangrove sediment, and reclassification of Aestuariibacter aggregatus as Marisediminitalea aggregata comb. nov." Int. J. Syst. Evol. Microbiol. (2020) 70(1):457-4…
11	OTU_1100	Alcanivorax	Alcanivorax	Alcanivorax	0.57	Alcanivorax	1	0.99767	1.0023	EF648146.1.1503	Bacteria;Proteobacteria;Gammaproteobacteria;Pseudomonadales;Alcanivoracaceae1;Alcanivorax;unculturedAlcanivoraxsp.
12	OTU_1204	Alcanivorax	Alcanivorax	Alcanivorax	1	Alcanivorax	0.9907	0.99068	1	LK391622.1.1251	Bacteria;Proteobacteria;Gammaproteobacteria;Pseudomonadales;Alcanivoracaceae1;Alcanivorax;Alcanivoraxsp.BHA32
13	OTU_1370	Alcanivorax	Alcanivorax	Alcanivorax	1	Alcanivorax	0.9883	0.98834	1	FUFK010104029.1.1376	Bacteria;Proteobacteria;Gammaproteobacteria;Pseudomonadales;Alcanivoracaceae1;Alcanivorax;metagenome
14	OTU_27	Alcanivorax	Alcanivorax	Alcanivorax	1	Alcanivorax	1	1	1	FJ825901.1.1497	Bacteria;Proteobacteria;Gammaproteobacteria;Pseudomonadales;Alcanivoracaceae1;Alcanivorax;unculturedmarinebacterium
15	OTU_3	Alcanivorax	Alcanivorax	Alcanivorax	1	Alcanivorax	1	1	1	KM820459.1.1492	Bacteria;Proteobacteria;Gammaproteobacteria;Pseudomonadales;Alcanivoracaceae1;Alcanivorax;unculturedbacterium
16	OTU_67	Alcanivorax	Alcanivorax	Alcanivorax	0.74	Alcanivorax	0.9907	0.99068	1	AB597552.1.1539	Bacteria;Proteobacteria;Gammaproteobacteria;Pseudomonadales;Alcanivoracaceae1;Alcanivorax;unculturedgammaproteobacterium
17	OTU_1128	Alistipes	Alistipes	Alistipes	1	Alistipes	1	1	1	HQ772677.1.1437	Bacteria;Bacteroidota;Bacteroidia;Bacteroidales;Rikenellaceae;Alistipes;unculturedorganism
18	OTU_2720	Allorhizobium-Neorhizobium-Pararhizobium-Rhizobium	Allorhizobium-Neorhizobium-Pararhizobium-Rhizobium	Neopararhizobium	0.35	Allorhizobium-Neorhizobium-Pararhizobium-Rhizobium	1	1	1	EF540437.1.1407	Bacteria;Proteobacteria;Alphaproteobacteria;Rhizobiales;Rhizobiaceae;Allorhizobium-Neorhizobium-Pararhizobium-Rhizobium;unculturedsoilbacterium
19	OTU_38	Allorhizobium-Neorhizobium-Pararhizobium-Rhizobium	Allorhizobium-Neorhizobium-Pararhizobium-Rhizobium	Agrobacterium	0.99	Allorhizobium-Neorhizobium-Pararhizobium-Rhizobium	1	1	1	GQ472936.1.1228	Bacteria;Proteobacteria;Alphaproteobacteria;Rhizobiales;Rhizobiaceae;Allorhizobium-Neorhizobium-Pararhizobium-Rhizobium;unculturedbacterium	The taxa units in the family Rhizobiaceae are not well established. The postitioning of genus Agrobacterium and genera Allorhizobium-Neorhizobium-Pararhizobium-Rhizobiumamong are unclear to date. Revised phylogeny of Rhizobiaceae: proposal of the delineation of Pararhizobium gen. nov., and 13 new species combinations. Mousavi SA, Willems A, Nesme X, de Lajudie P, Lindström K. Syst Appl Microbiol.…
20	OTU_1	Alteromonas	Alteromonas	Alteromonas	1	Alteromonas	1	1	1	HQ012269.1.1494	Bacteria;Proteobacteria;Gammaproteobacteria;Enterobacterales;Alteromonadaceae;Alteromonas;unculturedAlteromonassp.
21	OTU_2066	Alteromonas	Alteromonas	Alteromonas	0.97	Alteromonas	0.9021	0.99742	0.9044	AM887684.1.1235	Bacteria;Proteobacteria;Gammaproteobacteria;Enterobacterales;Alteromonadaceae;Alteromonas;Alteromonasmacleodii
22	OTU_2069	Alteromonas	Alteromonas	Alteromonas	0.98	Alteromonas	0.9722	0.97216	1	HQ012269.1.1494	Bacteria;Proteobacteria;Gammaproteobacteria;Enterobacterales;Alteromonadaceae;Alteromonas;unculturedAlteromonassp.
23	OTU_2568	Alteromonas	Alteromonas	Alteromonas	0.66	Alteromonas	0.9557	0.95349	1.0023	HQ225022.1.1495	Bacteria;Proteobacteria;Gammaproteobacteria;Enterobacterales;Alteromonadaceae;Alteromonas;unculturedbacterium
24	OTU_471	AT-s3-44	AT-s3-44	Rhodosalinus	0.27	AT-s3-44	0.9951	0.99505	1	HQ673883.1.1461	Bacteria;Proteobacteria;Alphaproteobacteria;AT-s3-44;unculturedbacterium
25	OTU_791	AT-s3-44	AT-s3-44	Parvibaculum	0.45	AT-s3-44	0.9975	0.99752	1	HQ652521.1.1356	Bacteria;Proteobacteria;Alphaproteobacteria;AT-s3-44;unculturedbacterium
26	OTU_105	Brevundimonas	Brevundimonas	Brevundimonas	0.99	Brevundimonas	1	1	1	GQ263803.1.1401	Bacteria;Proteobacteria;Alphaproteobacteria;Caulobacterales;Caulobacteraceae;Brevundimonas;unculturedbacterium
27	OTU_25	Brevundimonas	Brevundimonas	Brevundimonas	0.99	Brevundimonas	1	1	1	FJ562157.1.1232	Bacteria;Proteobacteria;Alphaproteobacteria;Caulobacterales;Caulobacteraceae;Brevundimonas;unculturedbacterium
28	OTU_44	Croceicoccus	Croceicoccus	Croceicoccus	0.99	Croceicoccus	1	1	1	CP019602.2763586.2765082	Bacteria;Proteobacteria;Alphaproteobacteria;Sphingomonadales;Sphingomonadaceae;Croceicoccus;Croceicoccusmarinus
29	OTU_13	Delftia	Delftia	Delftia	1	Delftia	1	1	1	EU705816.1.1232	Bacteria;Proteobacteria;Gammaproteobacteria;Burkholderiales;Comamonadaceae;Delftia;unculturedDelftiasp.
30	OTU_8	Empedobacter	Empedobacter	Empedobacter	1	Empedobacter	1	1	1	EU293154.1.1427	Bacteria;Bacteroidota;Bacteroidia;Flavobacteriales;Weeksellaceae;Empedobacter;Empedobacterbrevis
31	OTU_1043	Erysipelatoclostridium	Erysipelatoclostridium	Longibaculum	0.31	Erysipelatoclostridium	1	1	1	FCNA01000117.1.1283	Bacteria;Firmicutes;Bacilli;Erysipelotrichales;Erysipelatoclostridiaceae;Erysipelatoclostridium;ClostridialesbacteriumCHKCI006
32	OTU_1278	Erysipelatoclostridium	Erysipelatoclostridium	Erysipelatoclostridium	1	Erysipelatoclostridium	1	1	1	KF842056.1.1402	Bacteria;Firmicutes;Bacilli;Erysipelotrichales;Erysipelatoclostridiaceae;Erysipelatoclostridium;unculturedbacterium
33	OTU_2219	Erysipelatoclostridium	Erysipelatoclostridium	Massilimicrobiota	1	Erysipelatoclostridium	0.9977	0.99766	1	LN998062.1.1487	Bacteria;Firmicutes;Bacilli;Erysipelotrichales;Erysipelatoclostridiaceae;Erysipelatoclostridium;Massiliomicrobiotatimonensis
34	OTU_703	Erysipelatoclostridium	Erysipelatoclostridium	Clostridium XVIII	1	Erysipelatoclostridium	0.9977	0.99766	1	Y18188.1.1489	Bacteria;Firmicutes;Bacilli;Erysipelotrichales;Erysipelatoclostridiaceae;Erysipelatoclostridium;[Clostridium]cocleatum
35	OTU_779	Erysipelatoclostridium	Erysipelatoclostridium	Massilimicrobiota	0.99	Erysipelatoclostridium	1	1	1	AM275467.1.1476	Bacteria;Firmicutes;Bacilli;Erysipelotrichales;Erysipelatoclostridiaceae;Erysipelatoclostridium;unculturedbacterium
36	OTU_910	Erysipelatoclostridium	Erysipelatoclostridium	Clostridium XVIII	1	Erysipelatoclostridium	1	1	1	DQ057480.1.1449	Bacteria;Firmicutes;Bacilli;Erysipelotrichales;Erysipelatoclostridiaceae;Erysipelatoclostridium;bacteriumic1391
37	OTU_9	Erythrobacter	Erythrobacter	Erythrobacter	1	Erythrobacter	1	1	1	HM798928.1.1416	Bacteria;Proteobacteria;Alphaproteobacteria;Sphingomonadales;Sphingomonadaceae;Erythrobacter;unculturedSphingomonadalesbacterium
38	OTU_220	Gramella	Gramella	Gramella	1	Gramella	1	1	1	CP016359.1140432.1141953	Bacteria;Bacteroidota;Bacteroidia;Flavobacteriales;Flavobacteriaceae;Gramella;GramellaflavaJLT2011
39	OTU_812	Gramella	Gramella	Gramella	1	Gramella	0.9693	0.96934	1	CP016359.1140432.1141953	Bacteria;Bacteroidota;Bacteroidia;Flavobacteriales;Flavobacteriaceae;Gramella;GramellaflavaJLT2011
40	OTU_119	Haemophilus	Haemophilus	Haemophilus	1	Haemophilus	1	1	1	JF042351.1.1319	Bacteria;Proteobacteria;Gammaproteobacteria;Enterobacterales;Pasteurellaceae;Haemophilus;unculturedbacterium
41	OTU_2896	Halobacteriovorax	Halobacteriovorax	Halobacteriovorax	0.99	Halobacteriovorax	0.9744	0.97442	1	FN553492.1.1516	Bacteria;Bdellovibrionota;Bdellovibrionia;Bacteriovoracales;Bacteriovoracaceae;Halobacteriovorax;unculturedsedimentbacterium
42	OTU_30	Halobacteriovorax	Halobacteriovorax	Halobacteriovorax	1	Halobacteriovorax	1	1	1	JX391065.1.1514	Bacteria;Bdellovibrionota;Bdellovibrionia;Bacteriovoracales;Bacteriovoracaceae;Halobacteriovorax;unculturedbacterium
43	OTU_2937	Halomonas	Halomonas	Halomonas	0.77	Halomonas	0.695	1	0.695	JX528844.1.1433	Bacteria;Proteobacteria;Gammaproteobacteria;Pseudomonadales;Halomonadaceae;Halomonas;unculturedHalomonassp.
44	OTU_2948	Halomonas	Halomonas	Halomonas	1	Halomonas	0.9907	0.99068	1	EF144149.1.1407	Bacteria;Proteobacteria;Gammaproteobacteria;Pseudomonadales;Halomonadaceae;Halomonas;Halomonassaccharevitans
45	OTU_6	Halomonas	Halomonas	Halomonas	1	Halomonas	1	1	1	HQ721418.1.1457	Bacteria;Proteobacteria;Gammaproteobacteria;Pseudomonadales;Halomonadaceae;Halomonas;unculturedbacterium
46	OTU_88	Halomonas	Halomonas	Halomonas	0.99	Halomonas	1	1	1	JQ781698.1.1477	Bacteria;Proteobacteria;Gammaproteobacteria;Pseudomonadales;Halomonadaceae;Halomonas;Halomonaszincidurans
47	OTU_957	Halomonas	Halomonas	Halomonas	1	Halomonas	0.9977	0.99767	1	AY922995.1.1462	Bacteria;Proteobacteria;Gammaproteobacteria;Pseudomonadales;Halomonadaceae;Halomonas;Halomonasphoceae
48	OTU_56	Henriciella	Henriciella	Henriciella	1	Henriciella	0.9975	0.99752	1	KF271105.1.1379	Bacteria;Proteobacteria;Alphaproteobacteria;Caulobacterales;Hyphomonadaceae;Henriciella;unculturedbacterium
49	OTU_1388	Idiomarina	Idiomarina	Pseudidiomarina	0.93	Idiomarina	1	1	1	KF906565.1.1548	Bacteria;Proteobacteria;Gammaproteobacteria;Enterobacterales;Idiomarinaceae;Idiomarina;unculturedbacterium	The type species of this genus has alternatively been placed in the genus Idiomarina Ivanova et al. 2000
50	OTU_17	Idiomarina	Idiomarina	Idiomarina	1	Idiomarina	1	1	1	CP027188.2839671.2841219	Bacteria;Proteobacteria;Gammaproteobacteria;Enterobacterales;Idiomarinaceae;Idiomarina;Idiomarinasp.OT37-5b
51	OTU_5	Idiomarina	Idiomarina	Idiomarina	1	Idiomarina	1	1	1	AY526861.1.1455	Bacteria;Proteobacteria;Gammaproteobacteria;Enterobacterales;Idiomarinaceae;Idiomarina;Idiomarinafontislapidosi
52	OTU_78	Idiomarina	Idiomarina	Idiomarina	1	Idiomarina	1	1	1	AF052740.1.1465	Bacteria;Proteobacteria;Gammaproteobacteria;Enterobacterales;Idiomarinaceae;Idiomarina;Idiomarinaabyssalis
53	OTU_95	Idiomarina	Idiomarina	Pseudidiomarina	1	Idiomarina	1	0.99536	1.0047	JQ032432.1.1368	Bacteria;Proteobacteria;Gammaproteobacteria;Enterobacterales;Idiomarinaceae;Idiomarina;unculturedbacterium	The type species of this genus has alternatively been placed in the genus Idiomarina Ivanova et al. 2000
54	OTU_183	JL-ETNP-F27	JL-ETNP-F27	Anaerohalosphaera	0.44	JL-ETNP-F27	1	1	1	HM799058.1.1317	Bacteria;Planctomycetota;Phycisphaerae;Phycisphaerales;Phycisphaeraceae;JL-ETNP-F27;unculturedplanctomycete
55	OTU_736	JL-ETNP-F27	JL-ETNP-F27	Anaerohalosphaera	0.39	JL-ETNP-F27	1	1	1	HQ674440.1.1456	Bacteria;Planctomycetota;Phycisphaerae;Phycisphaerales;Phycisphaeraceae;JL-ETNP-F27;unculturedbacterium
56	OTU_229	Lachnoclostridium	Lachnoclostridium	Merdimonas	0.95	Lachnoclostridium	1	1	1	DQ793953.1.1281	Bacteria;Firmicutes;Clostridia;Lachnospirales;Lachnospiraceae;Lachnoclostridium;unculturedbacterium
57	OTU_47	Leeuwenhoekiella	Leeuwenhoekiella	Leeuwenhoekiella	1	Leeuwenhoekiella	0.9953	0.99528	1	AANC01000011.208.1734	Bacteria;Bacteroidota;Bacteroidia;Flavobacteriales;Flavobacteriaceae;Leeuwenhoekiella;LeeuwenhoekiellablandensisMED217
58	OTU_1238	Limimaricola	Loktanella	Limimaricola	1	Limimaricola	0.9926	0.99257	1	FJ826215.1.1415	Bacteria;Proteobacteria;Alphaproteobacteria;Rhodobacterales;Rhodobacteraceae;Limimaricola;unculturedmarinebacterium	Limimaricola is a new genus established in 2018. Phylogenetic analysis suggested that Loktanella species should be reclassified in the novel genus Limimaricola. Wirth JS, Whitman WB. Phylogenomic analyses of a clade within the roseobacter group suggest taxonomic reassignments of species of the genera Aestuariivita, Citreicella, Loktanella, Nautella, Pelagibaca, Ruegeria, Thalassobius, Thiobacimon…
59	OTU_1779	LS-NOB	LS-NOB	Nitrospina	0.71	LS-NOB	0.9975	0.99753	1	JN166351.1.1484	Bacteria;Nitrospinota;Nitrospinia;Nitrospinales;Nitrospinaceae;LS-NOB;unculturedmarinemicroorganism
60	OTU_280	LS-NOB	LS-NOB	Nitrospina	0.84	LS-NOB	1	1	1	HQ673735.1.1483	Bacteria;Nitrospinota;Nitrospinia;Nitrospinales;Nitrospinaceae;LS-NOB;unculturedbacterium
61	OTU_2392	Maricaulis	Maricaulis	Maricaulis	1	Maricaulis	0.9951	0.99505	1	AY162105.1.1320	Bacteria;Proteobacteria;Alphaproteobacteria;Caulobacterales;Hyphomonadaceae;Maricaulis;alphaproteobacteriumGMD21C01
62	OTU_43	Maricaulis	Maricaulis	Maricaulis	1	Maricaulis	1	1	1	AF513444.1.1241	Bacteria;Proteobacteria;Alphaproteobacteria;Caulobacterales;Hyphomonadaceae;Maricaulis;HyphomonasgroupbacteriumLA49
63	OTU_1991	Marine_Methylotrophic_Group_2	Marine_Methylotrophic_Group_2	Methylomonas	0.38	Marine_Methylotrophic_Group_2	0.979	0.97902	1	LC171285.1.1455	Bacteria;Proteobacteria;Gammaproteobacteria;Methylococcales;Methylomonadaceae;MarineMethylotrophicGroup2;unculturedgammaproteobacterium
64	OTU_2087	Marine_Methylotrophic_Group_2	Marine_Methylotrophic_Group_2	Methylomicrobium	0.23	Marine_Methylotrophic_Group_2	0.9977	0.99767	1	JN662126.1.1386	Bacteria;Proteobacteria;Gammaproteobacteria;Methylococcales;Methylomonadaceae;MarineMethylotrophicGroup2;unculturedgammaproteobacterium
65	OTU_2635	Marine_Methylotrophic_Group_2	Marine_Methylotrophic_Group_2	Methylomonas	0.72	Marine_Methylotrophic_Group_2	0.9813	0.98131	1	JF268387.1.1495	Bacteria;Proteobacteria;Gammaproteobacteria;Methylococcales;Methylomonadaceae;MarineMethylotrophicGroup2;unculturedbacterium
66	OTU_32	Marine_Methylotrophic_Group_2	Marine_Methylotrophic_Group_2	Methylomonas	0.6	Marine_Methylotrophic_Group_2	1	1	1	KC522846.1.1522	Bacteria;Proteobacteria;Gammaproteobacteria;Methylococcales;Methylomonadaceae;MarineMethylotrophicGroup2;unculturedbacterium
67	OTU_10	Marinobacter	Marinobacter	Marinobacter	1	Marinobacter	1	1	1	DQ396166.1.1536	Bacteria;Proteobacteria;Gammaproteobacteria;Pseudomonadales;Marinobacteraceae;Marinobacter;unculturedorganism
68	OTU_1019	Marinobacter	Marinobacter	Marinobacter	1	Marinobacter	0.993	0.99301	1	JX878958.1.1462	Bacteria;Proteobacteria;Gammaproteobacteria;Pseudomonadales;Marinobacteraceae;Marinobacter;unculturedbacterium
69	OTU_106	Marinobacter	Marinobacter	Marinobacter	1	Marinobacter	1	1	1	KF859672.1.1499	Bacteria;Proteobacteria;Gammaproteobacteria;Pseudomonadales;Marinobacteraceae;Marinobacter;unculturedMarinobactersp.
70	OTU_1206	Marinobacter	Marinobacter	Marinobacter	1	Marinobacter	0.9907	0.99068	1	JN874087.1.1459	Bacteria;Proteobacteria;Gammaproteobacteria;Pseudomonadales;Marinobacteraceae;Marinobacter;unculturedbacterium
71	OTU_1753	Marinobacter	Marinobacter	Marinobacter	0.95	Marinobacter	0.9814	0.98135	1	KJ814188.1.1501	Bacteria;Proteobacteria;Gammaproteobacteria;Pseudomonadales;Marinobacteraceae;Marinobacter;unculturedbacterium
72	OTU_210	Marinobacter	Marinobacter	Marinobacter	1	Marinobacter	1	1	1	KM820457.1.1503	Bacteria;Proteobacteria;Gammaproteobacteria;Pseudomonadales;Marinobacteraceae;Marinobacter;unculturedbacterium
73	OTU_2341	Marinobacter	Marinobacter	Marinobacter	1	Marinobacter	0.9883	0.98834	1	KP410295.1.1504	Bacteria;Proteobacteria;Gammaproteobacteria;Pseudomonadales;Marinobacteraceae;Marinobacter;unculturedbacterium
74	OTU_36	Marinobacter	Marinobacter	Marinobacter	1	Marinobacter	1	1	1	DQ665807.1.1501	Bacteria;Proteobacteria;Gammaproteobacteria;Pseudomonadales;Marinobacteraceae;Marinobacter;Marinobactersp.ASs2020
75	OTU_316	Marinobacterium	Marinobacterium	Marinobacterium	1	Marinobacterium	0.9977	0.99767	1	DQ917760.1.1508	Bacteria;Proteobacteria;Gammaproteobacteria;Pseudomonadales;Nitrincolaceae;Marinobacterium;Marinobacteriumlitorale
76	OTU_946	Marinobacterium	Marinobacterium	Marinobacterium	1	Marinobacterium	1	1	1	KM979145.1.1393	Bacteria;Proteobacteria;Gammaproteobacteria;Pseudomonadales;Nitrincolaceae;Marinobacterium;Marinobacteriumsp.H2-24
77	OTU_294	Massilia	Massilia	Massilia	1	Massilia	1	1	1	KX301306.1.1494	Bacteria;Proteobacteria;Gammaproteobacteria;Burkholderiales;Oxalobacteraceae;Massilia;Massiliatimonae
78	OTU_96	Mesoflavibacter	Mesoflavibacter	Mesoflavibacter	0.97	Mesoflavibacter	0.9953	0.99528	1	KF906587.1.1516	Bacteria;Bacteroidota;Bacteroidia;Flavobacteriales;Flavobacteriaceae;Mesoflavibacter;unculturedbacterium
79	OTU_70	Mesonia	Mesonia	Mesonia	1	Mesonia	0.9976	0.99764	1	KF906584.1.1516	Bacteria;Bacteroidota;Bacteroidia;Flavobacteriales;Flavobacteriaceae;Mesonia;unculturedbacterium
80	OTU_1574	Methylophaga	Methylophaga	Methylophaga	1	Methylophaga	0.9977	0.99535	1.0023	AM268863.1.1488	Bacteria;Proteobacteria;Gammaproteobacteria;Nitrosococcales;Methylophagaceae;Methylophaga;unculturedprokaryote
81	OTU_775	Methylophaga	Methylophaga	Methylophaga	0.99	Methylophaga	1	1	1	KF790925.1.1505	Bacteria;Proteobacteria;Gammaproteobacteria;Nitrosococcales;Methylophagaceae;Methylophaga;Methylophagasp.SM14
82	OTU_1142	Methyloprofundus	Methyloprofundus	Methyloprofundus	0.98	Methyloprofundus	0.98368	98.368	0.98368	KF440297.1.1395	Bacteria;Proteobacteria;Gammaproteobacteria;Methylococcales;Methylomonadaceae;Methyloprofundus;unculturedbacterium
83	OTU_1061	Methyloprofundus	Methyloprofundus	Methyloprofundus	1	Methyloprofundus	0.98368	98.368	0.98368	JF268396.1.1498	Bacteria;Proteobacteria;Gammaproteobacteria;Methylococcales;Methylomonadaceae;Methyloprofundus;unculturedbacterium
84	OTU_1294	Methyloprofundus	Methyloprofundus	Methyloprofundus	0.98	Methyloprofundus	0.99299	99.299	0.99299	EF687190.1.1363	Bacteria;Proteobacteria;Gammaproteobacteria;Methylococcales;Methylomonadaceae;Methyloprofundus;unculturedbacterium
85	OTU_40	Methylotenera	Methylotenera	Methylotenera	0.96	Methylotenera	1	0.99767	1.0023	AJXC01002904.641.2162	Bacteria;Proteobacteria;Gammaproteobacteria;Burkholderiales;Methylophilaceae;Methylotenera;marinemetagenome
86	OTU_60	Microbacterium	Microbacterium	Microbacterium	1	Microbacterium	1	1	1	KC169799.1.1493	Bacteria;Actinobacteriota;Actinobacteria;Micrococcales;Microbacteriaceae;Microbacterium;Microbacteriumsp.CC-AMFLN-3
87	OTU_21	Milano-WF1B-03	Milano-WF1B-03	Methylobacter	0.61	Milano-WF1B-03	1	1	1	JQ678377.1.1516	Bacteria;Proteobacteria;Gammaproteobacteria;Methylococcales;Methylomonadaceae;Milano-WF1B-03;unculturedbacterium
88	OTU_2157	Muricauda	Muricauda	Muricauda	1	Muricauda	0.9953	0.99528	1	KY770389.1.1421	Bacteria;Bacteroidota;Bacteroidia;Flavobacteriales;Flavobacteriaceae;Muricauda;Muricaudasp.
89	OTU_53	Muricauda	Muricauda	Muricauda	1	Muricauda	1	1	1	FJ825782.1.1483	Bacteria;Bacteroidota;Bacteroidia;Flavobacteriales;Flavobacteriaceae;Muricauda;unculturedmarinebacterium
90	OTU_1996	Nitrospina	Nitrospina	Nitrospina	0.86	Nitrospina	0.9778	0.97778	1	JN232990.1.1446	Bacteria;Nitrospinota;Nitrospinia;Nitrospinales;Nitrospinaceae;Nitrospina;uncultureddeltaproteobacterium
91	OTU_2095	Nitrospina	Nitrospina	Nitrospina	0.91	Nitrospina	0.9926	0.99263	1	JN977323.1.1514	Bacteria;Nitrospinota;Nitrospinia;Nitrospinales;Nitrospinaceae;Nitrospina;unculturedbacterium
92	OTU_2225	Nitrospina	Nitrospina	Nitrospina	0.6	Nitrospina	0.9827	0.98272	1	HQ673897.1.1485	Bacteria;Nitrospinota;Nitrospinia;Nitrospinales;Nitrospinaceae;Nitrospina;unculturedbacterium
93	OTU_2941	Nitrospina	Nitrospina	Nitrospina	0.69	Nitrospina	0.9704	0.97037	1	JX531177.1.1424	Bacteria;Nitrospinota;Nitrospinia;Nitrospinales;Nitrospinaceae;Nitrospina;unculturedNitrospinasp.
94	OTU_732	Nitrospina	Nitrospina	Nitrospina	0.81	Nitrospina	0.9975	0.99753	1	MF571801.1.1483	Bacteria;Nitrospinota;Nitrospinia;Nitrospinales;Nitrospinaceae;Nitrospina;unculturedbacterium
95	OTU_18	Oceanicaulis	Oceanicaulis	Oceanicaulis	1	Oceanicaulis	1	1	1	AB681546.1.1392	Bacteria;Proteobacteria;Alphaproteobacteria;Caulobacterales;Hyphomonadaceae;Oceanicaulis;Oceanicaulissp.NBRC101722
96	OTU_135	Oleibacter	Oleibacter	Oleibacter	0.88	Oleibacter	1	1	1	AF353239.1.1455	Bacteria;Proteobacteria;Gammaproteobacteria;Pseudomonadales;Saccharospirillaceae;Oleibacter;unculturedgammaproteobacterium
97	OTU_16	Oleibacter	Oleibacter	Oleibacter	1	Oleibacter	1	1	1	MG002065.1.1226	Bacteria;Proteobacteria;Gammaproteobacteria;Pseudomonadales;Saccharospirillaceae;Oleibacter;unculturedbacterium
98	OTU_101	Halobacteriovorax	Peredibacter	Peredibacter	0.71	Peredibacter	0.9791	0.97907	1	HQ697773.1.1507	Bacteria;Bdellovibrionota;Bdellovibrionia;Bacteriovoracales;Bacteriovoracaceae;Peredibacter;unculturedbacterium
99	OTU_14	Halobacteriovorax	Peredibacter	Halobacteriovorax	0.9	Peredibacter	0.9837	0.98372	1	JX527459.1.1432	Bacteria;Bdellovibrionota;Bdellovibrionia;Bacteriovoracales;Bacteriovoracaceae;Peredibacter;unculturedBacteriovoraxsp.	The genus Peredibacter has been reclassified to Halobacteriovorax . Richards, Gary P et al. “Purification and Host Specificity of Predatory Halobacteriovorax Isolates from Seawater.” Applied and environmental microbiology vol. 82,3 922-7. 20 Nov. 2015, doi:10.1128/AEM.03136-15
100	OTU_2131	Halobacteriovorax	Peredibacter	Peredibacter	0.44	Peredibacter	0.9419	0.94186	1	GU451621.1.1262	Bacteria;Bdellovibrionota;Bdellovibrionia;Bacteriovoracales;Bacteriovoracaceae;Peredibacter;unculturedbacterium
101	OTU_262	Halobacteriovorax	Peredibacter	Halobacteriovorax	0.94	Peredibacter	0.9814	0.9814	1	JX530554.1.1433	Bacteria;Bdellovibrionota;Bdellovibrionia;Bacteriovoracales;Bacteriovoracaceae;Peredibacter;unculturedBacteriovoraxsp.
102	OTU_42	Phaeocystidibacter	Phaeocystidibacter	Phaeocystidibacter	1	Phaeocystidibacter	1	1	1	KM609933.1.1480	Bacteria;Bacteroidota;Bacteroidia;Flavobacteriales;Cryomorphaceae;Phaeocystidibacter;Phaeocystidibactermarisrubri
103	OTU_107	Phenylobacterium	Phenylobacterium	Phenylobacterium	0.84	Phenylobacterium	1	1	1	HM066282.1.1452	Bacteria;Proteobacteria;Alphaproteobacteria;Caulobacterales;Caulobacteraceae;Phenylobacterium;unculturedbacterium
104	OTU_2842	Prochlorococcus_MIT9313	Prochlorococcus_MIT9313	GpIIa	1	Prochlorococcus_MIT9313	0.9877	0.98768	1	BX548175.208864.210328	Bacteria;Cyanobacteria;Cyanobacteriia;Synechococcales;Cyanobiaceae;ProchlorococcusMIT9313;Prochlorococcusmarinusstr.MIT9313
105	OTU_92	Prochlorococcus_MIT9313	Prochlorococcus_MIT9313	Prochlorococcus	0.67	Prochlorococcus_MIT9313	1	1	1	JX945361.1.1446	Bacteria;Cyanobacteria;Cyanobacteriia;Synechococcales;Cyanobiaceae;ProchlorococcusMIT9313;unculturedbacterium
106	OTU_1301	Pseudoalteromonas	Pseudoalteromonas	Pseudoalteromonas	1	Pseudoalteromonas	0.993	0.98611	1.007	DQ985065.1.1502	Bacteria;Proteobacteria;Gammaproteobacteria;Enterobacterales;Pseudoalteromonadaceae;Pseudoalteromonas;Pseudoalteromonassp.JL1130
107	OTU_15	Pseudoalteromonas	Pseudoalteromonas	Pseudoalteromonas	1	Pseudoalteromonas	1	1	1	KF906589.1.1533	Bacteria;Proteobacteria;Gammaproteobacteria;Enterobacterales;Pseudoalteromonadaceae;Pseudoalteromonas;unculturedbacterium
108	OTU_2280	Pseudoalteromonas	Pseudoalteromonas	Pseudoalteromonas	0.99	Pseudoalteromonas	1	1	1	AB617562.1.1418	Bacteria;Proteobacteria;Gammaproteobacteria;Enterobacterales;Pseudoalteromonadaceae;Pseudoalteromonas;Pseudoalteromonasruthenica
109	OTU_113	Pseudohongiella	Pseudohongiella	Agitococcus	0.11	Pseudohongiella	1	1	1	KY194449.1.1516	Bacteria;Proteobacteria;Gammaproteobacteria;Pseudomonadales;Pseudohongiellaceae;Pseudohongiella;unculturedbacterium
110	OTU_1490	Pseudohongiella	Pseudohongiella	Pseudohongiella	0.85	Pseudohongiella	0.9837	0.98368	1	HQ163470.1.1376	Bacteria;Proteobacteria;Gammaproteobacteria;Pseudomonadales;Pseudohongiellaceae;Pseudohongiella;unculturedgammaproteobacterium
111	OTU_246	Pseudohongiella	Pseudohongiella	Pseudohongiella	0.7	Pseudohongiella	0.9953	0.99534	1	JQ678498.1.1506	Bacteria;Proteobacteria;Gammaproteobacteria;Pseudomonadales;Pseudohongiellaceae;Pseudohongiella;unculturedbacterium
112	OTU_59	Pseudohongiella	Pseudohongiella	Pseudohongiella	1	Pseudohongiella	1	1	1	KJ814157.1.1493	Bacteria;Proteobacteria;Gammaproteobacteria;Pseudomonadales;Pseudohongiellaceae;Pseudohongiella;unculturedbacterium
113	OTU_86	Pseudohongiella	Pseudohongiella	Pseudohongiella	1	Pseudohongiella	1	1	1	HM598193.1.1501	Bacteria;Proteobacteria;Gammaproteobacteria;Pseudomonadales;Pseudohongiellaceae;Pseudohongiella;unculturedbacterium
114	OTU_1216	Pseudomonas	Pseudomonas	Pseudomonas	0.99	Pseudomonas	0.9977	0.99767	1	FJ901028.1.1314	Bacteria;Proteobacteria;Gammaproteobacteria;Pseudomonadales;Pseudomonadaceae;Pseudomonas;unculturedbacterium
115	OTU_137	Pseudomonas	Pseudomonas	Pseudomonas	1	Pseudomonas	1	1	1	JX222702.1.1499	Bacteria;Proteobacteria;Gammaproteobacteria;Pseudomonadales;Pseudomonadaceae;Pseudomonas;unculturedbacterium
116	OTU_2154	Pseudomonas	Pseudomonas	Pseudomonas	1	Pseudomonas	1	1	1	CP032677.509311.510848	Bacteria;Proteobacteria;Gammaproteobacteria;Pseudomonadales;Pseudomonadaceae;Pseudomonas;Pseudomonassp.Leaf58
117	OTU_2584	Pseudomonas	Pseudomonas	Pseudomonas	0.6	Pseudomonas	0.972	0.97203	1	GQ415382.1.1491	Bacteria;Proteobacteria;Gammaproteobacteria;Pseudomonadales;Pseudomonadaceae;Pseudomonas;unculturedbacterium
118	OTU_619	Pseudomonas	Pseudomonas	Pseudomonas	1	Pseudomonas	1	1	1	KF859734.1.1497	Bacteria;Proteobacteria;Gammaproteobacteria;Pseudomonadales;Pseudomonadaceae;Pseudomonas;unculturedPseudomonassp.
119	OTU_664	Pseudomonas	Pseudomonas	Pseudomonas	1	Pseudomonas	0.993	0.99301	1	HQ234265.1.1390	Bacteria;Proteobacteria;Gammaproteobacteria;Pseudomonadales;Pseudomonadaceae;Pseudomonas;Pseudomonasxinjiangensis
120	OTU_33	Pseudooceanicola	Pseudooceanicola	Pseudooceanicola	1	Pseudooceanicola	1	1	1	KR269654.1.1202	Bacteria;Proteobacteria;Alphaproteobacteria;Rhodobacterales;Rhodobacteraceae;Pseudooceanicola;unculturedOceanicolasp.
121	OTU_20	Rhodococcus	Rhodococcus	Rhodococcus	0.98	Rhodococcus	1	1	1	CP027793.2839401.2840918	Bacteria;Actinobacteriota;Actinobacteria;Corynebacteriales;Nocardiaceae;Rhodococcus;Rhodococcushoagii
122	OTU_29	Rhodococcus	Rhodococcus	Rhodococcus	1	Rhodococcus	1	1	1	CP012749.5722973.5724495	Bacteria;Actinobacteriota;Actinobacteria;Corynebacteriales;Nocardiaceae;Rhodococcus;Rhodococcussp.008
123	OTU_818	Rhodococcus	Rhodococcus	Rhodococcus	1	Rhodococcus	1	1	1	KX509252.1.1475	Bacteria;Actinobacteriota;Actinobacteria;Corynebacteriales;Nocardiaceae;Rhodococcus;unculturedbacterium
124	OTU_122	Roseivirga	Roseivirga	Roseivirga	1	Roseivirga	1	1	1	KT229616.1.1375	Bacteria;Bacteroidota;Bacteroidia;Cytophagales;Cyclobacteriaceae;Roseivirga;Fabivirgathermotolerans
125	OTU_79	Roseivirga	Roseivirga	Roseivirga	1	Roseivirga	1	1	1	JQ032556.1.1444	Bacteria;Bacteroidota;Bacteroidia;Cytophagales;Cyclobacteriaceae;Roseivirga;unculturedbacterium
126	OTU_83	Ruegeria	Ruegeria	Epibacterium	0.97	Ruegeria	1	1	1	JF895520.1.1362	Bacteria;Proteobacteria;Alphaproteobacteria;Rhodobacterales;Rhodobacteraceae;Epibacterium;Ruegeriasp.EDA3
127	OTU_23	Salinicola	Salinicola	Salinicola	0.98	Salinicola	0.9977	0.99767	1	AY664056.1.1253	Bacteria;Proteobacteria;Gammaproteobacteria;Pseudomonadales;Halomonadaceae;Salinicola;unculturedHalomonassp.
128	OTU_124	Salinimonas	Salinimonas	Salinimonas	0.99	Salinimonas	0.9953	0.99534	1	HQ340609.1.1457	Bacteria;Proteobacteria;Gammaproteobacteria;Enterobacterales;Alteromonadaceae;Salinimonas;Salinimonaslutimaris
129	OTU_76	Salinisphaera	Salinisphaera	Salinisphaera	1	Salinisphaera	0.9977	0.99767	1	AB735546.1.1462	Bacteria;Proteobacteria;Gammaproteobacteria;Salinisphaerales;Salinisphaeraceae;Salinisphaera;SalinisphaerajaponicaYTM-1
130	OTU_90	Salinisphaera	Salinisphaera	Salinisphaera	1	Salinisphaera	0.993	0.99302	1	JF775510.1.1499	Bacteria;Proteobacteria;Gammaproteobacteria;Salinisphaerales;Salinisphaeraceae;Salinisphaera;Salinisphaerasp.P7-4
131	OTU_1992	SEEP-SRB2	SEEP-SRB2	Dissulfurirhabdus	1	SEEP-SRB2	0.9977	0.99768	1	AJ535254.1.1523	Bacteria;Desulfobacterota;Dissulfuribacteria;Dissulfuribacterales;Dissulfuribacteraceae;SEEP-SRB2;uncultureddeltaproteobacterium
132	OTU_702	Sphingobacterium	Sphingobacterium	Sphingobacterium	1	Sphingobacterium	0.9953	0.99528	1	AB563783.1.1461	Bacteria;Bacteroidota;Bacteroidia;Sphingobacteriales;Sphingobacteriaceae;Sphingobacterium;Sphingobacteriumthermophilum
133	OTU_1136	Sphingomonas	Sphingomonas	Sphingomonas	1	Sphingomonas	1	1	1	EU803989.1.1260	Bacteria;Proteobacteria;Alphaproteobacteria;Sphingomonadales;Sphingomonadaceae;Sphingomonas;unculturedbacterium
134	OTU_129	Sphingomonas	Sphingomonas	Sphingomonas	1	Sphingomonas	1	1	1	EU202880.1.1393	Bacteria;Proteobacteria;Alphaproteobacteria;Sphingomonadales;Sphingomonadaceae;Sphingomonas;unculturedSphingomonassp.
135	OTU_1349	Sphingomonas	Sphingomonas	Sphingomonas	0.89	Sphingomonas	0.9926	0.99257	1	JX133407.1.1448	Bacteria;Proteobacteria;Alphaproteobacteria;Sphingomonadales;Sphingomonadaceae;Sphingomonas;unculturedbacterium
136	OTU_2776	Sphingomonas	Sphingomonas	Sphingomonas	0.84	Sphingomonas	0.9852	0.98515	1	FJ192774.1.1441	Bacteria;Proteobacteria;Alphaproteobacteria;Sphingomonadales;Sphingomonadaceae;Sphingomonas;unculturedCaulobactersp.
137	OTU_359	Sphingomonas	Sphingomonas	Sphingomonas	0.93	Sphingomonas	0.9951	0.99505	1	KC172231.1.1448	Bacteria;Proteobacteria;Alphaproteobacteria;Sphingomonadales;Sphingomonadaceae;Sphingomonas;unculturedAlphaproteobacteriabacterium
138	OTU_457	Sphingomonas	Sphingomonas	Sphingosinithalassobacter	0.28	Sphingomonas	0.9086	0.90418	1.0049	HQ121088.1.1458	Bacteria;Proteobacteria;Alphaproteobacteria;Sphingomonadales;Sphingomonadaceae;Sphingomonas;unculturedbacterium
139	OTU_919	Sphingomonas	Sphingomonas	Sphingomonas	1	Sphingomonas	0.9975	0.99752	1	HM066503.1.1457	Bacteria;Proteobacteria;Alphaproteobacteria;Sphingomonadales;Sphingomonadaceae;Sphingomonas;unculturedbacterium
140	OTU_283	Staphylococcus	Staphylococcus	Staphylococcus	1	Staphylococcus	1	1	1	FMNX01000005.560.2034	Bacteria;Firmicutes;Bacilli;Staphylococcales;Staphylococcaceae;Staphylococcus;Staphylococcusaureus
141	OTU_7	Stenotrophomonas	Stenotrophomonas	Stenotrophomonas	1	Stenotrophomonas	1	1	1	CP027562.4866235.4867781	Bacteria;Proteobacteria;Gammaproteobacteria;Xanthomonadales;Xanthomonadaceae;Stenotrophomonas;Stenotrophomonasmaltophilia
142	OTU_7	Stenotrophomonas	Stenotrophomonas	Stenotrophomonas	1	Stenotrophomonas	1	1	1	CP027562.4866235.4867781	Bacteria;Proteobacteria;Gammaproteobacteria;Xanthomonadales;Xanthomonadaceae;Stenotrophomonas;Stenotrophomonasmaltophilia
143	OTU_1272	Sulfurovum	Sulfurovum	Sulfurovum	1	Sulfurovum	0.9901	0.9901	1	FJ497265.1.1435	Bacteria;Campylobacterota;Campylobacteria;Campylobacterales;Sulfurovaceae;Sulfurovum;unculturedEpsilonproteobacteriabacterium
144	OTU_1279	Sulfurovum	Sulfurovum	Sulfurovum	0.96	Sulfurovum	0.9951	0.99505	1	KT257836.1.1476	Bacteria;Campylobacterota;Campylobacteria;Campylobacterales;Sulfurovaceae;Sulfurovum;unculturedbacterium
145	OTU_2223	Sulfurovum	Sulfurovum	Sulfurovum	1	Sulfurovum	0.9951	0.99505	1	JN662254.1.1386	Bacteria;Campylobacterota;Campylobacteria;Campylobacterales;Sulfurovaceae;Sulfurovum;unculturedEpsilonproteobacteriabacterium
146	OTU_54	Sulfurovum	Sulfurovum	Sulfurovum	1	Sulfurovum	1	1	1	KX097420.1.1473	Bacteria;Campylobacterota;Campylobacteria;Campylobacterales;Sulfurovaceae;Sulfurovum;unculturedbacterium
147	OTU_875	Sulfurovum	Sulfurovum	Sulfurovum	1	Sulfurovum	0.9901	0.98765	1.0025	AF420360.1.1467	Bacteria;Campylobacterota;Campylobacteria;Campylobacterales;Sulfurovaceae;Sulfurovum;unculturedproteobacterium
148	OTU_1679	SUP05_cluster	SUP05_cluster	Methyloprofundus	0.27	SUP05_cluster	0.9837	0.98368	1	KP005012.1.1410	Bacteria;Proteobacteria;Gammaproteobacteria;Pseudomonadales;Thioglobaceae;SUP05cluster;uncultureddeep-seabacterium
149	OTU_1920	SUP05_cluster	SUP05_cluster	Methylobacter	0.35	SUP05_cluster	0.9977	0.99767	1	KF780849.1.1214	Bacteria;Proteobacteria;Gammaproteobacteria;Pseudomonadales;Thioglobaceae;SUP05cluster;bacteriumsymbiontofBathymodiolusbrevior
150	OTU_64	SUP05_cluster	SUP05_cluster	Methyloprofundus	0.19	SUP05_cluster	1	1	1	FPHW01000160.1003.2549	Bacteria;Proteobacteria;Gammaproteobacteria;Pseudomonadales;Thioglobaceae;SUP05cluster;hydrothermalventmetagenome
151	OTU_717	SUP05_cluster	SUP05_cluster	Halothiobacillus	0.52	SUP05_cluster	0.9837	0.98368	1	JX570602.1.1371	Bacteria;Proteobacteria;Gammaproteobacteria;Pseudomonadales;Thioglobaceae;SUP05cluster;endosymbiontofRidgeiapiscesae
152	OTU_72	SUP05_cluster	SUP05_cluster	Sedimenticola	0.3	SUP05_cluster	0.9977	0.99767	1	KY194403.1.1480	Bacteria;Proteobacteria;Gammaproteobacteria;Pseudomonadales;Thioglobaceae;SUP05cluster;unculturedbacterium
153	OTU_941	SUP05_cluster	SUP05_cluster	Methylomarinum	0.16	SUP05_cluster	0.958	0.95804	1	HE814580.1.1495	Bacteria;Proteobacteria;Gammaproteobacteria;Pseudomonadales;Thioglobaceae;SUP05cluster;unculturedbacterium
154	OTU_1213	Sva0996_marine_group	Sva0996_marine_group	Actinomarinicola	0.89	Sva0996_marine_group	1	1	1	EU491214.1.1478	Bacteria;Actinobacteriota;Acidimicrobiia;Microtrichales;Microtrichaceae;Sva0996marinegroup;unculturedbacterium
155	OTU_1485	Sva0996_marine_group	Sva0996_marine_group	Actinomarinicola	0.67	Sva0996_marine_group	1	1	1	JN166276.1.1480	Bacteria;Actinobacteriota;Acidimicrobiia;Microtrichales;Microtrichaceae;Sva0996marinegroup;unculturedmarinemicroorganism
156	OTU_1671	Sva0996_marine_group	Sva0996_marine_group	Actinomarinicola	0.53	Sva0996_marine_group	0.9951	0.99506	1	EU374087.1.1485	Bacteria;Actinobacteriota;Acidimicrobiia;Microtrichales;Microtrichaceae;Sva0996marinegroup;unculturedactinobacterium
157	OTU_2264	Sva0996_marine_group	Sva0996_marine_group	Actinomarinicola	0.63	Sva0996_marine_group	0.9975	0.99753	1	KC294763.1.1318	Bacteria;Actinobacteriota;Acidimicrobiia;Microtrichales;Microtrichaceae;Sva0996marinegroup;unculturedbacterium
158	OTU_2638	Sva0996_marine_group	Sva0996_marine_group	Aciditerrimonas	0.39	Sva0996_marine_group	0.9463	0.94634	1	KY194426.1.1481	Bacteria;Actinobacteriota;Acidimicrobiia;Microtrichales;Microtrichaceae;Sva0996marinegroup;unculturedbacterium
159	OTU_66	Sva0996_marine_group	Sva0996_marine_group	Aciditerrimonas	0.19	Sva0996_marine_group	1	1	1	KY194031.1.1471	Bacteria;Actinobacteriota;Acidimicrobiia;Microtrichales;Microtrichaceae;Sva0996marinegroup;unculturedbacterium
160	OTU_81	Sva0996_marine_group	Sva0996_marine_group	Actinomarinicola	0.68	Sva0996_marine_group	0.9975	0.99753	1	JQ678417.1.1486	Bacteria;Actinobacteriota;Acidimicrobiia;Microtrichales;Microtrichaceae;Sva0996marinegroup;unculturedbacterium
161	OTU_884	Sva0996_marine_group	Sva0996_marine_group	Actinomarinicola	0.43	Sva0996_marine_group	0.9852	0.98519	1	HQ674189.1.1476	Bacteria;Actinobacteriota;Acidimicrobiia;Microtrichales;Microtrichaceae;Sva0996marinegroup;unculturedbacterium
162	OTU_97	Sva0996_marine_group	Sva0996_marine_group	Actinomarinicola	0.72	Sva0996_marine_group	0.9901	0.99012	1	JN233632.1.1442	Bacteria;Actinobacteriota;Acidimicrobiia;Microtrichales;Microtrichaceae;Sva0996marinegroup;unculturedmarinebacterium
163	OTU_84	Thalassobius	Thalassobius	Thalassobius	0.53	Thalassobius	1	1	1	FJ403072.1.1425	Bacteria;Proteobacteria;Alphaproteobacteria;Rhodobacterales;Rhodobacteraceae;Thalassobius;unculturedThalassobiussp.
164	OTU_300	Thalassolituus	Thalassolituus	Bacterioplanoides	1	Thalassolituus	1	1	1	KF170318.1.1446	Bacteria;Proteobacteria;Gammaproteobacteria;Pseudomonadales;Saccharospirillaceae;Thalassolituus;Thalassolituusoleivorans
165	OTU_12	Thalassospira	Thalassospira	Thalassospira	1	Thalassospira	1	1	1	KM820427.1.1470	Bacteria;Proteobacteria;Alphaproteobacteria;Rhodospirillales;Thalassospiraceae;Thalassospira;unculturedbacterium
166	OTU_2438	Thalassospira	Thalassospira	Thalassospira	0.98	Thalassospira	0.9654	0.96535	1	AF505720.1.1421	Bacteria;Proteobacteria;Alphaproteobacteria;Rhodospirillales;Thalassospiraceae;Thalassospira;alphaproteobacteriumUMB1A
167	OTU_2719	Thalassospira	Thalassospira	Thalassospira	1	Thalassospira	0.9191	0.99602	0.9228	KF906595.1.1486	Bacteria;Proteobacteria;Alphaproteobacteria;Rhodospirillales;Thalassospiraceae;Thalassospira;unculturedbacterium
168	OTU_116	Vibrio	Vibrio	Vibrio	1	Vibrio	1	1	1	KF859564.1.1512	Bacteria;Proteobacteria;Gammaproteobacteria;Enterobacterales;Vibrionaceae;Vibrio;unculturedVibriosp.
169	OTU_1333	Vibrio	Vibrio	Vibrio	1	Vibrio	1	1	1	KF799755.1.1517	Bacteria;Proteobacteria;Gammaproteobacteria;Enterobacterales;Vibrionaceae;Vibrio;unculturedbacterium
170	OTU_533	Vibrio	Vibrio	Vibrio	1	Vibrio	1	1	1	MH315868.1.1430	Bacteria;Proteobacteria;Gammaproteobacteria;Enterobacterales;Vibrionaceae;Vibrio;Vibriosp.
171	OTU_777	Vibrio	Vibrio	Vibrio	0.96	Vibrio	1	1	1	MG554550.1.1446	Bacteria;Proteobacteria;Gammaproteobacteria;Enterobacterales;Vibrionaceae;Vibrio;unculturedVibriosp.
172	OTU_100	Zunongwangia	Zunongwangia	Zunongwangia	1	Zunongwangia	1	1	1	KC907713.1.1470	Bacteria;Bacteroidota;Bacteroidia;Flavobacteriales;Flavobacteriaceae;Zunongwangia;Zunongwangiamangrovi
173	OTU_1013	Zunongwangia	Zunongwangia	Zunongwangia	1	Zunongwangia	1	1	1	JQ844757.1.1490	Bacteria;Bacteroidota;Bacteroidia;Flavobacteriales;Flavobacteriaceae;Zunongwangia;Zunongwangiaatlantica22II14-10F7
174	OTU_26	Zunongwangia	Zunongwangia	Zunongwangia	1	Zunongwangia	1	1	1	CP001650.1984317.1985839	Bacteria;Bacteroidota;Bacteroidia;Flavobacteriales;Flavobacteriaceae;Zunongwangia;ZunongwangiaprofundaSM-A87
	Note: Assigned_Genus: each OTU was assigned to a genus manually based on the results generated by Usearch, RDP classfier and blastn. If inconsistency was found amond data of three tools, we would inspect the confidence value (RDP), adjusted identity and information literature, and then assigned the genus. Adj. iden = adjusted identity, formula = (identity of alignment region) * (query coverage) ;…
	confidence values lower than 0.8, or identity values lower than 0.97 were highlighted in red
	tools & database
		tool	tool version	database version
		blastn (BLAST+)	v2.10.1+	SILVA 138
		RDPclassifier	v2.13	RDP taxonomy 18
		Usearch	v10	SILVA 138
